# Supplementary material for: Citrulline malate supplementation does not improve German Volume Training performance or reduce muscle soreness in moderately trained males and females
Source: PubMed Central journal article supplement (PMC6086018; doi:10.1186/s12970-018-0245-8), 2018-08-10
Supplement: 12970_2018_245_MOESM1_ESM.pdf [file 12970_2018_245_MOESM1_ESM.pdf]

**Additional file 1. Integration values for all  $^1\text{H}$  chemical environments in citrulline malate, relative to the signal at H9.**

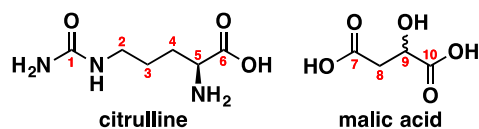

| Sample | n | Citrulline    |               |               |               | Malic Acid    |               |
|--------|---|---------------|---------------|---------------|---------------|---------------|---------------|
|        |   | H5 (3.65, 1H) | H2 (2.96, 2H) | H4 (1.65, 2H) | H3 (1.43, 2H) | H9 (4.37, 1H) | H8 (2.70, 2H) |
| A      | 1 | 1.6062        | 3.2810        | 3.2942        | 3.3043        | 1.000         | 2.0581        |
|        | 2 | 1.4777        | 3.0538        | 3.0847        | 3.0771        | 1.000         | 2.0668        |
|        | 3 | 1.7590        | 3.5838        | 3.5938        | 3.6102        | 1.000         | 2.1116        |
| B      | 1 | 2.0075        | 3.9889        | 3.9974        | 3.9287        | 1.000         | 1.9094        |
|        | 2 | 1.8801        | 3.7434        | 3.8589        | 3.8458        | 1.000         | 2.0575        |
|        | 3 | 1.8700        | 3.7396        | 3.7775        | 3.8043        | 1.000         | 2.0650        |
| C      | 1 | 1.4449        | 2.9574        | 2.9803        | 2.9340        | 1.000         | 1.9909        |
|        | 2 | 1.5433        | 3.0975        | 3.1774        | 3.1635        | 1.000         | 2.0994        |
|        | 3 | 1.5452        | 3.1401        | 3.2020        | 3.1722        | 1.000         | 2.0940        |
| D      | 1 | 1.6930        | 3.4156        | 3.5606        | 3.4290        | 1.000         | 1.9620        |
|        | 2 | 1.4904        | 2.9904        | 3.0342        | 3.0498        | 1.000         | 2.0823        |
|        | 3 | 1.4699        | 2.9699        | 3.0594        | 3.0269        | 1.000         | 2.0451        |
| E      | 1 | 1.1224        | 2.2566        | 2.2668        | 2.2460        | 1.000         | 1.9967        |
|        | 2 | 1.1067        | 2.2098        | 2.2494        | 2.2632        | 1.000         | 2.0967        |
|        | 3 | 1.1107        | 2.2159        | 2.2909        | 2.2559        | 1.000         | 2.0640        |
