# Supplementary material for: Citrulline malate supplementation does not improve German Volume Training performance or reduce muscle soreness in moderately trained males and females
Source: PubMed Central journal article supplement (PMC6086018; doi:10.1186/s12970-018-0245-8), 2018-08-10
Supplement: 12970_2018_245_MOESM2_ESM.pdf [file 12970_2018_245_MOESM2_ESM.pdf]

**Additional File 2. Integration ratios between all nuclei in citrulline (H5, H2, H4, H3) and those in malate (H8, H9), including mean and standard deviation for individual experiments: values calculated from data in additional file 1.**

| S | n | individual nuclear ratios |               |               |               |       |       |       | mean  | st. dev. |         |
|---|---|---------------------------|---------------|---------------|---------------|-------|-------|-------|-------|----------|---------|
|   |   | H5/H9                     | (H2/2)/<br>H9 | (H4/2)/<br>H9 | (H3/2)/<br>H9 | H5/H8 | H2/H8 | H4/H8 |       |          | H3/H8   |
| A | 1 | 1.606                     | 1.641         | 1.647         | 1.652         | 1.561 | 1.594 | 1.601 | 1.606 | 1.613    | 0.0311  |
|   | 2 | 1.478                     | 1.527         | 1.542         | 1.539         | 1.430 | 1.478 | 1.493 | 1.489 | 1.497    | 0.0378  |
|   | 3 | 1.759                     | 1.792         | 1.797         | 1.805         | 1.666 | 1.697 | 1.702 | 1.710 | 1.741    | 0.0537  |
| B | 1 | 2.008                     | 1.994         | 1.999         | 1.964         | 2.103 | 2.089 | 2.094 | 2.058 | 2.038    | 0.0535  |
|   | 2 | 1.880                     | 1.872         | 1.929         | 1.923         | 1.828 | 1.819 | 1.876 | 1.869 | 1.874    | 0.0390  |
|   | 3 | 1.870                     | 1.870         | 1.889         | 1.902         | 1.811 | 1.811 | 1.829 | 1.842 | 1.853    | 0.0348  |
| C | 1 | 1.445                     | 1.479         | 1.490         | 1.467         | 1.452 | 1.485 | 1.497 | 1.474 | 1.474    | 0.0183  |
|   | 2 | 1.543                     | 1.549         | 1.589         | 1.582         | 1.470 | 1.475 | 1.513 | 1.507 | 1.529    | 0.0447  |
|   | 3 | 1.545                     | 1.570         | 1.601         | 1.586         | 1.476 | 1.500 | 1.529 | 1.515 | 1.540    | 0.0435  |
| D | 1 | 1.693                     | 1.708         | 1.780         | 1.715         | 1.726 | 1.741 | 1.815 | 1.748 | 1.741    | 0.0403  |
|   | 2 | 1.490                     | 1.495         | 1.517         | 1.525         | 1.431 | 1.436 | 1.457 | 1.465 | 1.477    | 0.0353  |
|   | 3 | 1.470                     | 1.485         | 1.530         | 1.513         | 1.437 | 1.452 | 1.496 | 1.480 | 1.483    | 0.0304  |
| E | 1 | 1.122                     | 1.128         | 1.133         | 1.123         | 1.124 | 1.130 | 1.135 | 1.125 | 1.128    | 0.00488 |
|   | 2 | 1.107                     | 1.105         | 1.125         | 1.132         | 1.056 | 1.054 | 1.073 | 1.079 | 1.091    | 0.0300  |
|   | 3 | 1.111                     | 1.108         | 1.145         | 1.128         | 1.076 | 1.074 | 1.110 | 1.093 | 1.106    | 0.0244  |
