# Supplementary material for: Citrulline malate supplementation does not improve German Volume Training performance or reduce muscle soreness in moderately trained males and females
Source: PubMed Central journal article supplement (PMC6086018; doi:10.1186/s12970-018-0245-8), 2018-08-10
Supplement: 12970_2018_245_MOESM3_ESM.pdf [file 12970_2018_245_MOESM3_ESM.pdf]

**Additional File 3. Mean Number of Repetitions Performed Per Set, with and without Citrulline Malate Supplementation**

|                                 | Set 1      | Set 2      | Set 3                   | Set 4     | Set 5                    | Set 6                   | Set 7     | Set 8                    | Set 9                  | Set 10                   |
|---------------------------------|------------|------------|-------------------------|-----------|--------------------------|-------------------------|-----------|--------------------------|------------------------|--------------------------|
| <b>Citrulline Malate</b>        | 10.0 ± 0.0 | 10.0 ± 0.0 | 9.7 ± 0.8               | 9.8 ± 0.5 | 9.3 ± 2.0                | 9.4 ± 2.0               | 8.9 ± 2.2 | 8.2 ± 2.2                | 8.2 ± 2.4              | 7.4 ± 2.6                |
| <b>Placebo</b>                  | 10.0 ± 0.0 | 10.0 ± 0.0 | 10.0 ± 0.0              | 9.9 ± 0.3 | 9.8 ± 0.8                | 9.9 ± 1.4               | 8.9 ± 1.5 | 8.8 ± 1.6                | 8.8 ± 1.6              | 8.4 ± 1.8                |
| <b>Mean reps</b>                | 10.0 ± 0.0 | 10.0 ± 0.0 | 9.7 ± 0.6 <sup>ab</sup> | 9.9 ± 0.4 | 9.4 ± 1.5 <sup>cde</sup> | 9.4 ± 1.7 <sup>fg</sup> | 8.8 ± 1.9 | 8.1 ± 2.0 <sup>acf</sup> | 8.0 ± 2.1 <sup>d</sup> | 7.7 ± 2.3 <sup>beg</sup> |
| <b>P Value Sets</b>             |            |            |                         |           |                          | 0.01                    |           |                          |                        |                          |
| <b>P Value Treatment</b>        |            |            |                         |           |                          | 0.33                    |           |                          |                        |                          |
| <b>P Value Treatment × Sets</b> |            |            |                         |           |                          | 0.34                    |           |                          |                        |                          |

**Additional File 3. Mean Number of Repetitions Performed Per Set, with and without Citrulline Malate Supplementation.** ± indicates standard deviation, Means were compared using an repeated measures ANOVA. Post Hoc comparison was performed using a pairwise comparison and Bonferroni adjustment. Sets with the same letter are significantly different from one another P < 0.05.
