# Supplementary material for: Citrulline malate supplementation does not improve German Volume Training performance or reduce muscle soreness in moderately trained males and females
Source: PubMed Central journal article supplement (PMC6086018; doi:10.1186/s12970-018-0245-8), 2018-08-10
Supplement: 12970_2018_245_MOESM4_ESM.pdf [file 12970_2018_245_MOESM4_ESM.pdf]

**Additional File 4. Quadriceps Muscle Soreness Over Time following German Volume Training with, and without Citrulline Malate.**

|                                 | <b>Pre</b>               | <b>Post</b>              | <b>24 h</b>               | <b>48 h</b>              | <b>72 h</b>               |
|---------------------------------|--------------------------|--------------------------|---------------------------|--------------------------|---------------------------|
| <b>Citrulline Malate</b>        | 14.3 ± 13.7              | 73.1 ± 31.4              | 75.8 ± 33.4               | 65.1 ± 31.1              | 30.3 ± 19.8               |
| <b>Placebo</b>                  | 14.2 ± 12.5              | 59.7 ± 31.6              | 56.3 ± 34.0               | 26.8 ± 16.8              | 11.3 ± 6.4                |
| <b>Mean Soreness</b>            | 14.2 ± 12.9 <sup>a</sup> | 66.4 ± 31.7 <sup>b</sup> | 66.0 ± 34.5 <sup>bc</sup> | 46.0 ± 31.4 <sup>c</sup> | 20.9 ± 17.49 <sup>a</sup> |
| <b>P Value Time</b>             |                          |                          | < 0.01                    |                          |                           |
| <b>P Value Treatment</b>        |                          |                          | < 0.01                    |                          |                           |
| <b>P Value Time × Treatment</b> |                          |                          | 0.01                      |                          |                           |

**Additional File 4. Quadriceps Muscle Soreness Over Time following German Volume Training with, and without Citrulline Malate.** ±, indicate standard deviation, means were compared using a repeated measures ANOVA. Post Hoc comparison was performed using a pairwise comparison and Bonferroni adjustment. There was a significant difference between treatment, time and treatment × time  $P < 0.01$ . Different letters indicate a significant difference between time points. Error bars indicate standard error of the mean, h, hours.
