# Supplementary material for: Citrulline malate supplementation does not improve German Volume Training performance or reduce muscle soreness in moderately trained males and females
Source: PubMed Central journal article supplement (PMC6086018; doi:10.1186/s12970-018-0245-8), 2018-08-10
Supplement: 12970_2018_245_MOESM5_ESM.pdf [file 12970_2018_245_MOESM5_ESM.pdf]

**Additional File 5. Mean site specific muscle soreness score following German Volume Training**

|                  | <b>Pre</b> | <b>Post</b> | <b>24 h</b> | <b>48 h</b> | <b>72 h</b> |
|------------------|------------|-------------|-------------|-------------|-------------|
| Vastus Medialis  | 4.1 ± 4.4  | 25.1 ± 13.0 | 23.0 ± 15.5 | 19.0 ± 12.0 | 9.4 ± 9.4   |
| Vastus Lateralis | 4.0 ± 3.6  | 21.3 ± 12.3 | 21.3 ± 13.7 | 18.4 ± 10.2 | 7.7 ± 7.8   |
| Tensor Fasciae   | 2.9 ± 2.9  | 12.1 ± 8.0  | 16.5 ± 11.6 | 15.3 ± 11.7 | 8.2 ± 6.3   |
| Rectus Femoris   | 3.3 ± 3.5  | 14.5 ± 9.4  | 15.3 ± 9.0  | 12.5 ± 9.8  | 5.3 ± 4.1   |

± indicates standard deviation, h hours
